# Supplementary material for: Prognostic Significance of Premature Atrial Complexes Burden in Prediction of Long-Term Outcome
Source: PubMed Central journal article supplement — J Am Heart Assoc. 2015 Aug 27;4(9):e002192. doi: 10.1161/JAHA.115.002192 (PMC4599506; doi:10.1161/jaha.115.002192), 2015-08-27
Supplement: jah30004-e002192-sd1.pdf [file jah30004-e002192-sd1.pdf]

## SUPPLEMENTAL MATERIAL

Table S1. Baseline Characteristics of Propensity-matched Patient

|                            | PAC $\leq$ 76/day | PAC >76/day        | P value |
|----------------------------|-------------------|--------------------|---------|
| Baseline Characteristics   | n=1052            | n=1052             |         |
| Age, mean $\pm$ SDs        | 66.33 $\pm$ 14.22 | 65.98 $\pm$ 17.189 | 0.612   |
| Men                        | 6545(61.3)        | 639(60.7)          | 0.789   |
| Cirrhosis                  | 10(1.0)           | 8(0.8)             | 0.636   |
| Old MI                     | 8(0.8)            | 12(1.1)            | 0.501   |
| Valvular heart disease     | 34(3.2)           | 28(2.7)            | 0.520   |
| Cardiovascular risk factor |                   |                    |         |
| Diabetes mellitus          | 172(16.3)         | 170(16.2)          | 0.906   |
| Hypertension               | 464(44.1)         | 462(43.9)          | 0.930   |
| Hypercholesterolemia       | 149(14.2)         | 146(13.9)          | 0.851   |
| Heart failure              | 82(7.8)           | 84(8.0)            | 0.872   |
| NYHA I                     | 38(3.6)           | 42(4.0)            | 0.648   |
| NYHA II                    | 22(2.1)           | 23(2.2)            | 0.880   |
| NYHA III                   | 21(2.0)           | 19(1.8)            | 0.750   |
| NYHA IV                    | 1(0.1)            | 0(0.0)             | 0.750   |
| Coronary artery disease    | 400(38.0)         | 89(37.0)           | 0.620   |
| CKD                        | 18(1.7)           | 16(1.5)            | 0.729   |
| Congenital heart disease   | 0(0.0)            | 1(0.1)             | 1.000   |
| Medication                 |                   |                    |         |
| Anti-arrhythmia*           | 9(0.9)            | 12(1.1)            | 0.662   |
| Anti-hypertension†         | 168(16.0)         | 161(15.3)          | 0.674   |

Values are number of events (%) unless otherwise indicated. CV indicate cardiovascular; CKD, chronic kidney disease; MI, myocardial infarction; NYHA, New York Heart Association; PAC, premature atrial complex; SD, standard deviation.

\*Class I or class III antiarrhythmic drugs

†ACE inhibitors, alpha-blocker, angiotensin receptor blocker, Dihydropyrimidine calcium channel blocker, diuretics, beta-blocker, and nondihydropyridine calcium channel blocker

Table S2. Ten-Year Event Rates in Propensity-matched Patients With and Without PAC more than 76 beats per day

| Outcomes            | PAC $\leq$ 76/day | PAC $>$ 76/day | Crude               |         |
|---------------------|-------------------|----------------|---------------------|---------|
|                     | n=1052            | n=1052         | HR (95% CI)         | P Value |
| All-cause death     | 255(24.2)         | 295(28.0)      | 1.194(1.010-1.412)  | 0.038   |
| All-cause admission | 680(64.64)        | 679(64.54)     | 1.005(0.903-1.117)  | 0.933   |
| CV-cause admission  | 250(23.76)        | 302(28.71)     | 1.257(1.063-1.486)  | 0.008   |
| New-onset AF        | 78(7.41)          | 127(12.07)     | 1.661 (1.252-2.204) | <0.001  |
| PPM implantation    | 17(1.62)          | 46(4.37)       | 2.758 (1.581-4.811) | <0.001  |

Values are number of events (%) unless otherwise indicated. AF indicates atrial fibrillation; CI, confidence interval; CV, cardiovascular; HR, hazard ratio; PAC, premature atrial complex; PPM, permanent pacemaker.
